# Estimate of the rate of unreported COVID-19 cases during the first outbreak in Rio de Janeiro

M.S. Aronna<sup>1</sup>, R. Guglielmi<sup>2,\*</sup>, L.M. Moschen<sup>1</sup>

---

## Abstract

In this work we fit an epidemiological model SEIAQR (*Susceptible - Exposed - Infectious - Asymptomatic - Quarantined - Removed*) to the data of the first COVID-19 outbreak in Rio de Janeiro, Brazil. Particular emphasis is given to the unreported rate, that is, the proportion of infected individuals that is not detected by the health system. The evaluation of the parameters of the model is based on a combination of error-weighted least squares method and appropriate B-splines. The structural and practical identifiability is analyzed to support the feasibility and robustness of the parameters' estimation. We use the bootstrap method to quantify the uncertainty of the estimates. For the outbreak of March-July 2020 in Rio de Janeiro, we estimate about 90% of unreported cases, with a 95% confidence interval (85%, 93%).

*Keywords:* COVID-19 model, parameter estimation, identifiability, least squares, B-splines, bootstrap method

---

\*Corresponding author

*Email addresses:* [soledad.aronna@fgv.br](mailto:soledad.aronna@fgv.br) (M.S. Aronna), [roberto.guglielmi@uwaterloo.ca](mailto:roberto.guglielmi@uwaterloo.ca) (R. Guglielmi), [lucas.moschen@fgv.edu.br](mailto:lucas.moschen@fgv.edu.br) (L.M. Moschen)

<sup>1</sup>Escola de Matemática Aplicada - EMap, FGV, Rio de Janeiro, RJ, Brazil

<sup>2</sup>Department of Applied Mathematics, University of Waterloo, Waterloo, ON, Canada

*Preprint submitted to Infectious Disease Modelling*

*October 4, 2021*

## 1 **1. Introduction**

2 In late December 2019, health professionals in the city of Wuhan (Hubei,  
3 China) identified several cases of pneumonia (The 2019 nCoV Outbreak Joint  
4 Field Epidemiology Investigation Team and Q. Li, 2020) caused by a new  
5 coronavirus, which was named SARS-CoV-2. The disease induced by SARS-  
6 CoV-2, called COVID-19, rapidly spread around the world. Most COVID-  
7 19 cases are asymptomatic patients or with mild symptoms, but in more  
8 severe cases the disease may progress to viral pneumonia and multi-organ  
9 failure (World Health Organization, 2020) and can lead to hospitalization  
10 and death.

11 Brazil declared the disease as a public health emergency in February 2020,  
12 before the first COVID-19 cases were reported in Brazil. With the aim of  
13 protecting the population, several measures were implemented, including the  
14 adjustment of a legal framework to carry out isolation and quarantine (Croda  
15 et al., 2020). In March 2020, the governor of the state of Rio de Janeiro de-  
16 clared a public health emergency and ordered to avoid gatherings, closing  
17 down schools, restaurants, and theaters, and restricting access to beaches,  
18 shopping centers, and non-essential commerce (Dantas et al., 2020). Never-  
19 theless, these measures could not prevent the outbreak of the virus in the  
20 region, fueled by the large portion of asymptomatic individuals and by the  
21 long incubation period of the virus (Li et al., 2020). The objective of this  
22 work is to provide a quantitative estimate of crucial parameters related to  
23 the COVID-19 outbreak in the city of Rio de Janeiro during the period  
24 March-July 2020. The analysis is based on the fitting of the SEIAQR com-  
25 partmental model introduced in (Aronna et al., 2021) to real data retrieved

26 from the public health agency (Municipal Health Department, City Hall of  
27 Rio de Janeiro, 2021). This epidemiological model takes into account isola-  
28 tion, quarantine of confirmed cases, and testing of asymptomatic individuals  
29 as non-pharmaceutical strategies to contain the spread of the virus among  
30 the population (more details in Section 2.1). The main purpose of the study  
31 is to estimate the rate of unreported cases in the city of Rio de Janeiro. This  
32 is a crucial step to gauge the real extent and impact of the disease in the  
33 population, since most of the infections do not result in severe symptoms and  
34 are therefore likely to remain undetected.

35 The text is organized as follows: Section 2 collects different information  
36 regarding the mathematical model; the structure of the data as retrieved for  
37 the city of Rio de Janeiro; and the representation chosen for the parameters'  
38 estimation. Section 3 describes the notions of identifiability analyzed in the  
39 paper. Section 4 presents the results of the fitting of the data to the model  
40 and the resulting estimates of the parameters. Finally, the last two sections  
41 conclude the paper with some discussions and final comments.

#### 42 *1.1. Data Availability*

43 No new data are released as part of this research. This paper relies  
44 on publicly available datasets, with references provided in the text. The  
45 code required to reproduce our analysis is available in the GitHub reposi-  
46 tory (Moschen, 2021).

## 47 **2. Material and methods**

### 48 *2.1. The epidemiological model*

49 We recall the key features of the compartmental model from (Aronna  
50 et al., 2021). The population is split into the compartments  $S$ ,  $E$ ,  $I$ ,  $A$ ,  $Q$ ,  
51  $R$ , and  $D$ , corresponding to the compartments of susceptible, exposed, infec-  
52 tious, infectious and asymptomatic, quarantined or hospitalized, recovered,  
53 and dead individuals, respectively. These compartments are linked in the  
54 following way (see Figure 1): the individuals in  $S$  move to compartment  $E$   
55 when exposed to the virus. After a given latent period, they become infec-  
56 tious and thus pass to compartment  $I$ . At this stage, an individual in  $I$  may  
57 either report symptoms and thus move (after testing) to the compartment  
58  $Q$ , or result in an asymptomatic/paucisymptomatic infection and move to  
59 the compartment  $A$ . Individuals from  $E$  and  $A$  may move to  $Q$  as a result  
60 of the testing strategy among the asymptomatic population, as described in  
61 more detail in the following. Finally, the compartment  $R$  collects the re-  
62 covered individuals from either  $A$  or  $Q$ , whereas the compartment  $D$  counts  
63 the COVID-19-related deaths. By normalizing the total population to 1, the  
64 value of each variable  $S$ ,  $E$ ,  $I$ ,  $A$ ,  $Q$ ,  $R$ , and  $D$  represents the proportion of  
65 that given compartment in the total population. Moreover, we neglect the  
66 birth and natural death rates, given the limited time horizon chosen for the  
67 data fitting. The dynamics is described by the following set of differential

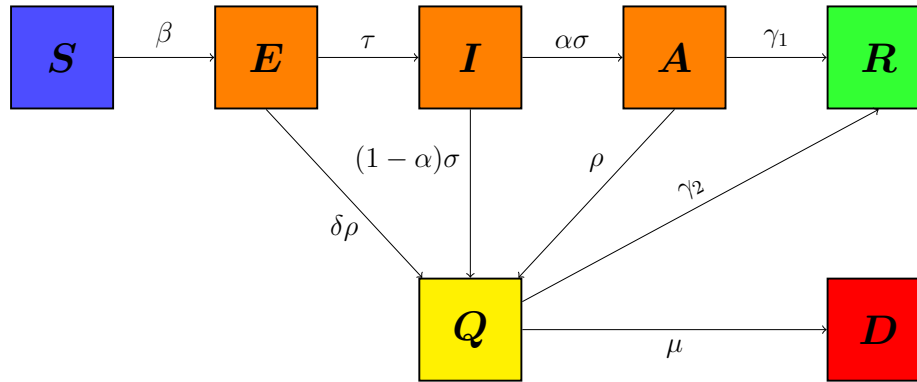

Figure 1: Diagram of the compartmental model

68 equations:

$$\begin{aligned}
 \dot{E} &= \beta(t)S(I + A) - \rho\delta E - \tau E \\
 \dot{I} &= \tau E - \sigma I - \rho I \\
 \dot{A} &= \sigma\alpha I - \rho A - \gamma_1 A \\
 \dot{Q} &= \sigma(1 - \alpha)I + \rho(\delta E + I + A) - \gamma_2 Q - \mu(t)Q \\
 \dot{S} &= -\beta(t)S(I + A) \\
 \dot{R} &= \gamma_1 A + \gamma_2 Q \\
 \dot{D} &= \mu(t)Q,
 \end{aligned} \tag{1}$$

69 which is a simplified version of the model studied in (Aronna et al., 2021).  
 70 More precisely, the simplification is done by considering the population as  
 71 a sole homogeneous group that is subject, in average, to the same mobility  
 72 restrictions, while the model from (Aronna et al., 2021) allowed for a dis-  
 73 tinction between two groups - one with high mobility consisting of essential  
 74 workers and the other with restricted mobility composed by the remainder of  
 75 the population. The parameters  $\tau, \sigma, \omega, \gamma_1, \gamma_2$ , and  $\mu$  related to the pathogen

76 and the induced disease are described in Table 1. The function  $\beta(t)$  is the  
77 *effective contact rate* at time  $t$ , which takes into account the average contact  
78 rate - directly affected by social distancing, public policies, use of Personal  
79 Protective Equipment (PPE), etc. - and the transmissibility of the virus -  
80 probability of infection given a contact between an infected and a susceptible  
81 individual. A constant of particular interest in our analysis is the parameter  
82  $\alpha \in (0, 1)$ , which represents the proportion of asymptomatic infectious cases.  
83 Among these cases, only those found positive through either testing induced  
84 by contact tracing or simply random testing are reported to the health sys-  
85 tem. All the others will remain unreported, being paucisymptomatic (but  
86 infectious) cases. In view of the scarcity of testing kits during the first out-  
87 break in Rio de Janeiro, we consider the parameter  $\alpha$  as a proxy for the  
88 *unreported rate* of infections. It is clear that estimating such parameter  $\alpha$   
89 is crucial to assess the effective size of the epidemic since such unreported  
90 cases may fuel the ongoing outbreak. Moreover, having an approximation  
91 of the size of the recovered population is also an essential information for  
92 epidemiological management and the comprehension of the virus behaviour.  
93 At the same time, estimating  $\alpha$  may be very difficult, since it accounts for  
94 those cases not detected by the radar of the health system (Nogrady, 2020).

95 As mentioned above, the unreported rate is strictly related to the avail-  
96 ability of testing kits and to the effectiveness of tracing, tracking, and testing  
97 in place during the outbreak. Such measures are described in model (1) by  
98 both the detection rate  $1 - \alpha$  and the parameter  $\rho$ , the latter representing  
99 the *rate of testing among asymptomatic or paucisymptomatic individuals*. We  
100 point out that the value of the unreported rate  $\alpha$  is not sensitive to small

101 variations of values of  $\rho$  (see Section 2.3.1).

102 For clarity of exposition, in model (1) we do not describe important fea-  
 103 tures such as the *sensitivity* and the *specificity* of the testing kits, although  
 104 these attributes may play a crucial role in consideration of new variants of  
 105 the virus (see (Aronna et al., 2021, Remark 2.3) for more details). With this  
 106 premise, in our model we assume that a person in the compartments  $I$  or  
 107  $A$  will always test positive, in  $S$  always negative, and in  $E$  positive with a  
 108 probability  $\delta \in (0, 1)$ . We also introduce the counter  $T(t)$  of total positive  
 109 tests, which follows the dynamics

$$\dot{T} = \sigma(1 - \alpha)I + \rho(\delta E + I + A) . \quad (2)$$

| <b>Par.</b>   | <b>Description</b>                                                |
|---------------|-------------------------------------------------------------------|
| $\tau^{-1}$   | latent period, from exposure to infectiousness                    |
| $\sigma^{-1}$ | time from infectiousness to possible symptoms onset               |
| $\omega^{-1}$ | incubation period (i.e. $\omega^{-1} = \tau^{-1} + \sigma^{-1}$ ) |
| $\gamma_1$    | recovery rate for paucisymptomatic individuals                    |
| $\gamma_2$    | recovery rate for detected positive cases                         |
| $\mu$         | mortality rate among detected positive cases                      |

Table 1: Parameters of COVID-19

110 *2.1.1. The basic reproduction number*

111 Assuming a constant contact rate  $\beta$ , the basic reproduction number  $\mathcal{R}_0$   
 112 associated with the model (1) is given by the relation

$$\mathcal{R}_0 = \frac{1}{2} \left( \varphi + \sqrt{\varphi^2 + \frac{4\sigma\alpha}{\rho + \gamma_1}\varphi} \right), \quad (3)$$

where

$$\varphi = \frac{\beta\tau}{(\rho\delta + \tau)(\sigma + \rho)}$$

113 (see (Aronna et al., 2021)). However, as the epidemic evolves, the recovered  
 114 and immune portion of the population becomes more relevant, impacting  
 115 the force of the spread. For this reason we introduce the effective (time-  
 116 dependent) reproduction number  $\mathcal{R}_t$ , which decreases as the susceptible pop-  
 117 ulation  $S(t)$  decreases and it is expressed by the same relation (3) of  $\mathcal{R}_0$  with  
 118  $\varphi$  replaced by

$$\varphi(t) = \frac{\beta(t)\tau S(t)}{(\rho\delta + \tau)(\sigma + \rho)}.$$

## 119 2.2. Data description

120 We retrieve data from the public health agency (Municipal Health Depart-  
 121 ment, City Hall of Rio de Janeiro, 2021), collecting information on COVID-19  
 122 confirmed cases and deaths in the municipality of Rio de Janeiro from March  
 01, 2020 to July 31, 2020. The format of the data is displayed in Table 2. The

| Notification date | Symptom onset date | Neighborhood    | Sex | Age group | Outcome | Outcome date | Ethnicity |
|-------------------|--------------------|-----------------|-----|-----------|---------|--------------|-----------|
| 05/18/20          | 05/03/20           | PACIENCIA       | M   | 50 - 59   | death   | 05/17/20     | Black     |
| 04/25/20          | 04/02/20           | BARRA DA TIJUCA | M   | 80 - 89   | death   | 05/01/20     | White     |
| 05/06/20          | 05/06/20           | CACHAMBI        | M   | 70 - 79   | death   | 05/07/20     | Ignored   |
| 06/12/20          | 06/02/20           | BARRA DA TIJUCA | M   | 70 - 79   | death   | 06/12/20     | White     |
| 06/13/20          | 04/26/20           | MARECHAL HERMES | M   | 60 - 69   | death   | 06/16/20     | Ignored   |

Table 2: Extract of the data: notification date, symptom onset date, neighborhood of residence, sex, age group, outcome, outcome date, ethnicity.

123



124 column `Symptom onset date` denotes the symptom onset date reported by  
125 the patient, and `Outcome date` marks the date on which the person recovers  
126 or dies (respectively `recovered` or `death` in the column `Outcome`), thus ceas-  
127 ing to be an active case. The column `Outcome date` was incomplete having  
128 about 3.7% of empty fields, so we were not able to use the recovery date as  
129 an input in our data fitting and missing death dates were imputed randomly  
130 according to the empirical distribution of the time difference between noti-  
131 fication and evolution dates. Finally, we normalize the data by the size of  
132 the population in Rio de Janeiro, which we assume to be 6.7 millions (IBGE,  
133 2021).

### 134 2.2.1. Smoothed and cumulative curves

135 There is a weekly seasonality in confirmed cases and deaths in the out-  
136 break with a negative deviation on weekends. This variation affects the model  
137 since it has no seasonal adjustment. For this reason, the data is smoothed  
138 using a centered *moving average* with 7 days. Thus, given a set of initial data  
139  $\{x_s\}_{1 \leq s \leq n}$  of confirmed positive cases or deaths, we replace it with

$$\hat{x}_t = \frac{1}{2k+1} \sum_{s=-k}^k x_{t+s},$$

140 where  $2k+1 = 7$ . Although this choice may seem arbitrary, it is directly  
141 related to the weekly periodicity of the data. Figures 2 and 3 display daily  
142 new cases and deaths, respectively. In particular, in Figure 2 we can observe  
143 that the first wave ends at the end of July, which justifies our choice to set the  
144 horizon of the data fitting on July 31st. Moreover, we calculate the curves  
145 of cumulative positive cases and deaths by evaluating

$$y_t = \sum_{i=-14}^t \hat{x}_i, \quad (t = 0, \dots, n).$$

146 The curves of cumulative cases, considering the self-reported symptoms onset,  
 147 set, and cumulative deaths will be compared to the compartments  $T$  and  $D$   
 148 from model (1).

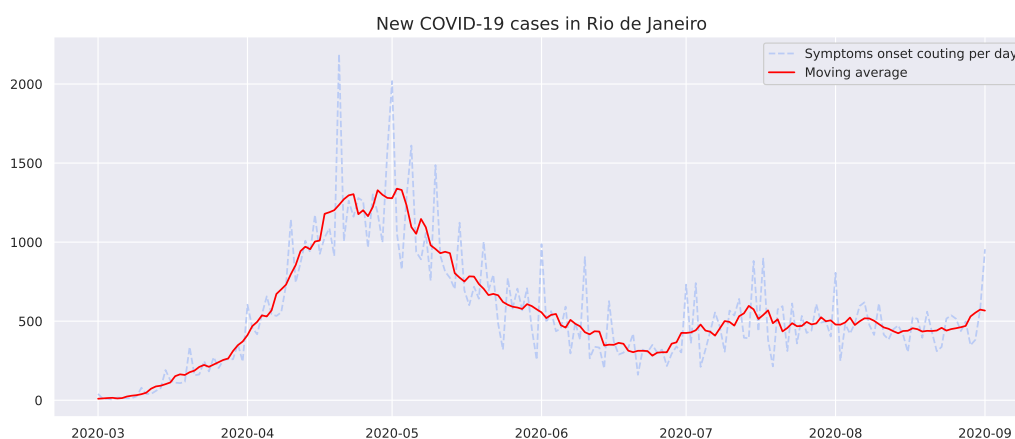

Figure 2: Daily new cases considering the self-reported symptoms onset in Rio de Janeiro between March and September of 2020. The 7-days moving average is displayed in red.

149 *2.3. Choice and modeling of parameters*

150 We split the set of parameters between a first group, consisting of epi-  
 151 demiological constants  $\tau, \sigma, \gamma_1, \gamma_2$ , and  $\delta$ , whose values we retrieve from the  
 152 literature (see Table 3), and a second group of parameters  $\beta(t), \alpha, \rho$ , and  $\mu(t)$   
 153 estimated from the data. The model used to represent the effective contact  
 154 rate  $\beta(t)$  and the mortality  $\mu(t)$  is described in Section 2.3.2. We start by  
 155 estimating the testing rate  $\rho$ .

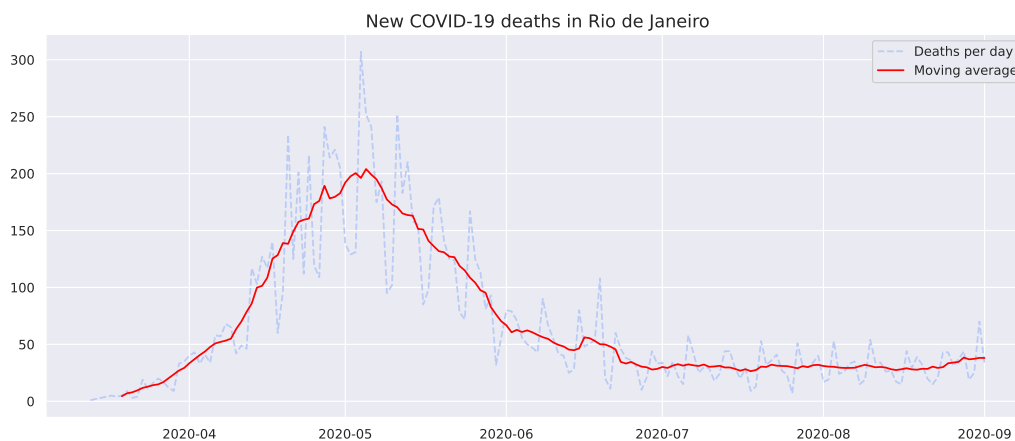

Figure 3: Daily new COVID-19 related deaths in Rio de Janeiro between March and September of 2020. The 7-days moving average is displayed in red.

156 *2.3.1. Estimation of  $\rho$*

157 We consider the testing data from the state of Rio de Janeiro (IBGE,  
158 2020), summarized in Table 4: about 2% of the population is tested each  
159 month, with a positive rate of about 20% among the tests done. We thus  
160 evaluate a daily testing of about 0.013% of the population, that is, we shall  
161 choose  $\rho \leq 1.3 \cdot 10^{-4}$ . In this range of values, the impact of the choice of  $\rho$   
162 on  $\alpha$  is negligible, as we verify in Table 6. For this reason, we assign to  $\rho$   
163 the value of  $\rho = 10^{-5}$ . Unfortunately, the data do not allow to discern the  
164 tests due to symptom onset from the testing of asymptomatic cases, due to  
165 the effectiveness of the trace, track, and test strategy.

166 *2.3.2. Representation of  $\beta$  and  $\mu$*

167 The parameter  $\beta$  in model (1) varies in time according to the different  
168 public policies in place in Rio de Janeiro in different periods (Official Journal  
169 of the State of Rio de Janeiro, 2020b; Estadão, 2020), and according to

| Par.            | Value                     | Reference             |
|-----------------|---------------------------|-----------------------|
| $\omega^{-1}$   | 5.74 days                 | Rai et al. (2021)     |
| $\tau^{-1}$     | 3.69 days                 | Li et al. (2020)      |
| $\sigma^{-1}$   | $\omega^{-1} - \tau^{-1}$ | Li et al. (2020)      |
| $\gamma_1^{-1}$ | 7.5 days                  | Byrne et al. (2020)   |
| $\gamma_2^{-1}$ | 13.4 days                 | Byrne et al. (2020)   |
| $\delta$        | 0.01                      | Kucirka et al. (2020) |

Table 3: Value of parameters retrieved from the literature.

|                   | July | August | September | October |
|-------------------|------|--------|-----------|---------|
| Percentage (%)    | 6.8  | 8.6    | 10.2      | 11.9    |
| Positive rate (%) | 1.2  | 1.5    | 1.9       | 2.4     |

Table 4: Percentage of cumulative total and positive tests among the population.

170 the compliance of the population with these measures. For this reason, we  
 171 approximate  $\beta$  by *B-splines* in the form

$$\beta(t) \approx \sum_{j=1}^s \beta_j B_{j,k}(t) ,$$

172 where  $\beta_j$  are the coefficients to be estimated and  $\{B_{j,k}(t)\}_{j=1}^s$  is the basis of  
 173 functions of order  $k$  (De Boor, 1978). A similar representation is used for the  
 174 mortality rate  $\mu(t)$ ,

$$\mu(t) \approx \sum_{j=1}^r \mu_j B_{j,k}(t) ,$$

175 which has to be understood as relative to the number of confirmed deaths.  
 176 This reflects the fact that the relative mortality may vary in periods of dis-

177 tress for the health system and lack of testing kits. We therefore define the  
178 vector of  $s + r + 1$  parameters to be estimated

$$\theta = (\alpha, \beta_1, \dots, \beta_s, \mu_1, \dots, \mu_r) . \quad (4)$$

179 We assume that the *knots*, i.e. the time points where the polynomials  
180 connect, are equally spaced. The number of knots is equal to the number of  
181 parameters ( $s$  for  $\beta$  and  $r$  for  $\mu$ ) plus the order of the B-spline ( $k$ ) plus 1.

182 To determine the order  $k$  and the number of coefficients  $s, r$ , for the B-  
183 spline approximation, we use the *Akaike Information Criterion (AIC)* (Liang  
184 et al., 2010), which under the normality hypothesis of the errors is given by  
185 the formula

$$AIC = n \ln \left( \frac{RSS}{n} \right) + 2(s + r + 1) ,$$

186 such that  $RSS$  is the sum of squares of the model's residuals. For the numer-  
187 ical experiments in Section 4, we compare models with 3 and 4 coefficients,  
188 as models with less than 3 coefficients are unable to capture temporal varia-  
189 tions over the timeframe of the outbreak, while models with  $s$  and  $r$  greater  
190 than 4 are computationally difficult to handle.

#### 191 2.4. Parameter estimation

192 For the parameter estimation, we follow the methods applied in (Cao  
193 et al., 2012; Liang et al., 2010; Ramsay et al., 2007). The first 15 days of  
194 March were used to estimate the initial conditions (see Section 2.4.1) and  
195 thus set up the model starting from March 16th, when the first contain-  
196 ment measures were imposed (Official Journal of the State of Rio de Janeiro,

197 2020a). Denoting by  $\hat{x}_i^{(1)}$  and  $\hat{x}_i^{(2)}$  the daily new cases and deaths, respec-  
198 tively, on the  $i$ -th day, where  $i = 0$  and  $i = n$  indicate March 16th and July  
199 31th, respectively, we assume that

$$\hat{x}_i^{(1)} = (T(i) - T(i - 1)) + \varepsilon_i^{(1)}, \quad i = -14, \dots, n, \quad (5)$$

$$\hat{x}_i^{(2)} = (D(i) - D(i - 1)) + \varepsilon_i^{(2)}, \quad i = -14, \dots, n, \quad (6)$$

200 where the sequences  $\{\varepsilon_i^{(1)}\}_{-14 \leq i \leq n}$  and  $\{\varepsilon_i^{(2)}\}_{-14 \leq i \leq n}$  are independent and  
201 normally distributed random variables with unknown variances  $\sigma_k^2$ ,  $k = 1, 2$ .  
202 Summing up we get

$$y_i^{(1)} = T(i) + \xi_i^{(1)}, \quad i = 0, \dots, n, \quad (7)$$

$$y_i^{(2)} = D(i) + \xi_i^{(2)}, \quad i = 0, \dots, n, \quad (8)$$

203 for the cumulative quantities, where  $\xi_i^{(k)} = \sum_{j=-14}^i \varepsilon_j^{(k)}$  for  $k = 1, 2$ . There-  
204 fore, for any  $i \leq j \leq n$  and  $k = 1, 2$ , the *covariance matrix* is defined by

$$\text{Cov}(\xi_i^{(k)}, \xi_j^{(k)}) = (i + 15)\sigma_k^2. \quad (9)$$

205 At this point, we introduce the notations  $\hat{T}(\theta)$  and  $\hat{D}(\theta)$  for the numerical  
206 approximations of the functions  $T$  and  $D$ , obtained by integrating equations  
207 (2) and (1), respectively, through the Runge-Kutta method and correspond-  
208 ing to the parameter vector  $\theta$  introduced in (4).

#### 209 2.4.1. Initial values estimation

210 Considering  $S \approx 1$  in the first 15 days of the epidemic, and focusing on  
211 the compartments  $E, I, A$ , and  $T$ , the system (1) reduces to

$$\begin{bmatrix} \dot{E} \\ \dot{I} \\ \dot{A} \\ \dot{T} \end{bmatrix} = \begin{bmatrix} -\tau & \beta & \beta & 0 \\ \tau & -\sigma & 0 & 0 \\ 0 & \sigma\alpha & -\gamma_1 & 0 \\ 0 & \sigma(1-\alpha) & 0 & 0 \end{bmatrix} \cdot \begin{bmatrix} E \\ I \\ A \\ T \end{bmatrix},$$

212 whose solution is a linear combination of exponential functions. The daily  
 213 testing of asymptomatic individuals at the beginning of the pandemic is  
 214 assumed to be negligible, thus  $\rho \approx 0$ , while the parameters  $\gamma_1, \tau$ , and  $\sigma$  are  
 215 taken from the existing literature (see Table 3). The parameters  $\alpha$  and  $\beta$   
 216 are fixed in this period. The value  $T(-14)$  corresponds to the confirmed  
 217 cases on March 2 and  $T(-15)$  is set to zero. Therefore, the parameters to be  
 218 estimated in this period are reduced to  $\theta_0 = (\alpha, \beta, E(-14), I(-14), A(-14))$ .  
 219 Considering  $\hat{T}(\theta_0)_i$  the approximation for  $T$  as function of  $\theta_0$  at day  $i$ , we  
 220 aim to minimize the expression

$$\sum_{i=-14}^0 w_i \left( y_i^{(1)} - \hat{T}(\theta_0)_i \right)^2,$$

221 where the weights  $w_i = \frac{i+14}{14}$  are chosen to give less importance to the  
 222 initial days. With these estimates, we obtain the values  $(E(0), I(0), A(0))$ .  
 223 Since  $R(-14) = 0$ , we get that  $Q(-14) = T(-14)$ , and thus we can integrate  
 224 the curves  $Q$  and  $R$  to obtain the values  $Q(0)$  and  $R(0)$ . Finally, we deduce  
 225  $S(0) = 1 - E(0) - I(0) - A(0) - Q(0) - R(0)$ .

226 **Remark 2.1.** *In order to analyze the sensitivity of the curves  $\hat{T}$  and  $\hat{D}$  with*  
 227 *respect to the initial guess of the parameter  $\theta_0$ , we perform a series of random*  
 228 *realizations and compare the final values  $\hat{T}(\theta_0)_n$  and  $\hat{D}(\theta_0)_n$  for all guesses.*

229 *2.4.2. Curve fitting*

230 We use the *weighted least squares* method to estimate the unknown pa-  
231 rameters by the data of daily confirmed cases and deaths given by equa-  
232 tions (7)-(8). This approach is based on the solution of a constrained non-  
233 linear minimization problem. We consider the following objective functional

$$F(\theta) = (y^{(1)} - \hat{T}(\theta))^T \Sigma^{-1} (y^{(1)} - \hat{T}(\theta)) + \psi (y^{(2)} - \hat{D}(\theta))^T \Sigma^{-1} (y^{(2)} - \hat{D}(\theta)), \quad (10)$$

234 where  $M^T$  denotes the transpose matrix of  $M$ ,  $\sigma_1^2 \Sigma$  and  $\sigma_2^2 \Sigma$  are the covari-  
235 ance matrices given by equations (9), and  $\psi$  is a weight proportional to the  
236 ratio of the variances  $\sigma_1^2 / \sigma_2^2$ . We solve the minimization problem by means  
237 of the L-BFGS-B algorithm (Byrd et al., 1995), which combines the gradient  
238 projection method and the BFGS algorithm with optimized use of computa-  
239 tional memory, implemented in the SciPy library in Python (Virtanen et al.,  
240 2020).

241 *2.5. Uncertainty quantification over the parameters*

242 Uncertainty is intrinsic in the parameters' estimation, owing to a com-  
243 bination of different factors, such as the natural variability of the data, the  
244 measurement errors of the data collection, and the biases of the estimation  
245 method. In order to tackle this problem, we construct confidence intervals  
246 for each unknown parameter. We rely on the *Bootstrap method* (Efron and  
247 Tibshirani, 1986), which involves a constructive approach based on the data.  
248 Starting from a series  $Y$ , it generates replicated data  $Y_1^*, \dots, Y_N^*$  and per-  
249 forms the estimations for each one. The confidence interval for the value



250 of interest is then given by the corresponding percentile of the  $N$  replicated  
251 samples (Joshi et al., 2006).

252 As a consequence of the error structure presented in equation (5), we  
253 generate each replicated curve  $T^{(B)}$  with the initial value  $T^{(B)}(0) = y_0^{(1)}$  and  
254 satisfying  $T^{(B)}(i+1) = T^{(B)}(i) + \varepsilon_{i+1}$  for any  $i \geq 1$ , where  $\varepsilon_{i+1} \sim \mathcal{N}(\hat{x}_{i+1}^1, \hat{\sigma}_1^2)$   
255 and  $\hat{\sigma}_1^2$  (see Appendix A) is an estimate for  $\sigma_1^2$ . An analogous construction  
256 is carried out for equation (6). In the estimation process, in order to avoid  
257 local minima, we randomize the initial guess of the optimization algorithm:  
258 for every  $j = 1, \dots, r + s + 1$ , we select initial guesses  $\theta_j^{\text{initial}}$  randomly chosen  
259 with uniform distribution in a prescribed range  $(l_j, u_j)$ , that represents the  
260 interval of admissible values for that parameter. After  $m$  iterations of this  
261 process, we pick the best solution minimizing the objective functional (10).

### 262 3. Theory

#### 263 3.1. Identifiability

264 From a structural-theoretical point of view, we are interested in ana-  
265 lyzing the *identifiability* of model (1). In general, this analysis identifies  
266 whether unknown parameters can be estimated in a unique way from the  
267 available measurements on the system (Audoly et al., 2001; Saccomani and  
268 Thomaseth, 2019). There are two conceptually different ways to develop this  
269 analysis: the structural approach (a priori) and the practical approach (a  
270 posteriori). The former is a theoretical property that resides in the struc-  
271 ture of the model itself: the parameters are *structurally identifiable* if they  
272 can be (globally) uniquely identified from the available measurements; they  
273 are called *locally structurally identifiable* if they are structurally identifiable

274 within a neighbourhood of the solution. On the other hand, the practical  
275 approach is based on the outcome of the data fitting, and it is evaluated by  
276 means of the *correlation matrix* of the parameters.

### 277 3.2. Structural identifiability

278 Consider a dynamical system

$$\begin{aligned} \dot{x} &= f(x(t), \theta), \quad x(0) = x_0 \\ y(t) &= h(x(t), \theta) \end{aligned} \tag{11}$$

279 where  $x(t) \in \mathbb{R}^n$ ,  $y(t) \in \mathbb{R}^m$  and  $f$  and  $h$  are rational functions of the variable  
280  $x$  and  $\theta \in \Theta \subset \mathbb{R}^p$ ,  $\Theta$  being the set of admissible values of the parameter  $\theta$ .  
281 The variable  $y$  is the output of the system, that is the observable component.  
282 In the model,  $y$  is the number of confirmed cases and deaths. When  $x(0) =$   
283  $x_0$ , the measurement with initial value  $x_0$  is  $y = \psi_{x_0}(\theta)$ . The structural  
284 identifiability (Ljung and Glad, 1994) of system (11) at a fixed  $\theta^* \in \Theta$  is  
285 related to the number of solutions of the equation

$$\psi_{x_0}(\theta) = \psi_{x_0}(\theta^*) . \tag{12}$$

286 The system (11) is *globally identifiable* at  $\theta^*$  if equation (12) has a unique  
287 solution  $\theta = \theta^*$ , or, equivalently if the mapping  $\psi_{x_0}$  is invertible. System (11)  
288 is *locally identifiable* if  $\psi_{x_0}$  is invertible in a neighborhood of  $\theta^*$ . In Appendix  
289 B we describe a computational method to verify structural identifiability  
290 using the DAISY software (Bellu et al., 2007).

### 291 3.3. Practical identifiability

292 The structural identifiability process developed in Section 3.2 is based  
293 on two hypotheses: the model structure is accurate and measurement errors

294 are absent. These hypotheses are not valid in practice and, therefore, it is  
295 necessary to assess whether the parameters can be reliably and accurately  
296 estimated from noisy data (Miao et al., 2011). Let  $\hat{\theta} = (\hat{\alpha}, \hat{\beta}_1, \dots, \hat{\mu}_r)$  be  
297 the vector of parameters estimated from the data fitting, and  $\hat{T}$ ,  $\hat{D}$ ,  $\hat{\sigma}_1$  and  
298  $\hat{\sigma}_2$  the model approximations for the confirmed cases, deaths, and their re-  
299 spective estimated variances, as introduced in Section 2.4. The correlation  
300 matrix quantifies the interdependence between model parameters, and can  
301 be computed as follows: starting from the *Fisher Information matrix (FIM)*

$$FIM = \frac{1}{\hat{\sigma}_1^2} \left( \frac{\partial \hat{T}}{\partial \theta} \right) \Big|_{\theta=\hat{\theta}}^T \Sigma^{-1} \left( \frac{\partial \hat{T}}{\partial \theta} \right) \Big|_{\theta=\hat{\theta}} + \frac{1}{\hat{\sigma}_2^2} \left( \frac{\partial \hat{D}}{\partial \theta} \right) \Big|_{\theta=\hat{\theta}}^T \Sigma^{-1} \left( \frac{\partial \hat{D}}{\partial \theta} \right) \Big|_{\theta=\hat{\theta}},$$

302 we compute the *covariance matrix C* as the inverse of *FIM*. Then, the  
303 element  $r_{ij}$ ,  $1 \leq i, j \leq r + s + 1$  of the *correlation matrix R* is defined as

$$r_{ij} = \frac{C_{ij}}{\sqrt{C_{ii}C_{jj}}}$$

304 which measures the correlation between  $\hat{\theta}_i$  and  $\hat{\theta}_j$ . A value close to 1 indicates  
305 that the parameters are strongly interconnected, and that each of them varies  
306 according to the other.

## 307 4. Results

308 We first set the initial conditions according to Section 2.4.1 and we ap-  
309 proximate the curve of the first two weeks of the outbreak, as represented in  
310 Figure 4. Following Remark 2.1, the fitting with respect to the initial guess  
311 for  $\theta_0$  is robust: the final values on July 31st range from 0.0127 to 0.0131. As  
312 summarized in Table 5, the best fitting over the outbreak period March-July

313 2020 is obtained by choosing an approximation with 4 coefficients for the two  
 parameters  $\beta$  and  $\mu$ , and B-spline of order 2 for  $\beta$  and order 1 for  $\mu$ .

| B-splines         |       | Parameter $\mu$ |        |        |        |        |        |        |
|-------------------|-------|-----------------|--------|--------|--------|--------|--------|--------|
|                   |       | (3,0)           | (3,1)  | (3,2)  | (4,0)  | (4,1)  | (4,2)  | (4,3)  |
| Parameter $\beta$ | (3,0) | -2.021          | -2.029 | -2.023 | -2.025 | -2.028 | -2.032 | -2.001 |
|                   | (3,1) | -2.228          | -2.241 | -2.266 | -2.288 | -2.298 | -2.311 | -2.298 |
|                   | (3,2) | -2.246          | -2.230 | -2.253 | -2.294 | -2.337 | -2.331 | -2.309 |
|                   | (4,0) | -1.967          | -1.979 | -1.979 | -1.998 | -2.002 | -2.000 | -1.987 |
|                   | (4,1) | -2.262          | -2.304 | -2.277 | -2.302 | -2.372 | -2.348 | -2.338 |
|                   | (4,2) | -2.346          | -2.243 | -2.262 | -2.300 | -2.374 | -2.357 | -2.332 |
|                   | (4,3) | -2.213          | -2.233 | -2.251 | -2.294 | -2.363 | -2.347 | -2.323 |

Table 5: Model selection according to AIC ( $10^3$  scale):  $(r, k)$  represents the number of coefficients and the order of the B-spline.

314

315 We fit the available data using the L-BFGS-B algorithm explained in  
 316 Section 2.4.2. Figure 5 shows a very good matching between the available  
 317 data and the fitting curves. To analyze the robustness of the estimate of  
 318  $\alpha$  with respect to the epidemiological parameters, we perform the following  
 319 analysis: choosing a grid of values based on the confidence interval of each  
 320 parameter, we estimate the parameters for each possible combination and we  
 321 determine the variation in the estimated value of  $\alpha$ , as reported in Table 6.

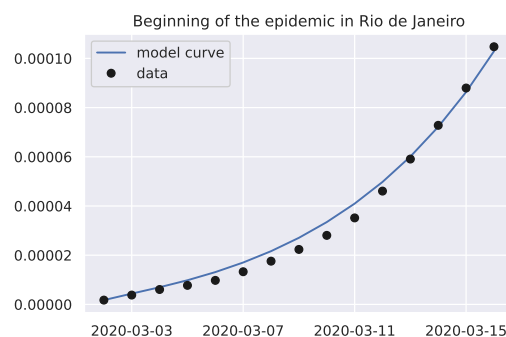

Figure 4: Fitting the curve of cumulative cases at the beginning of the outbreak

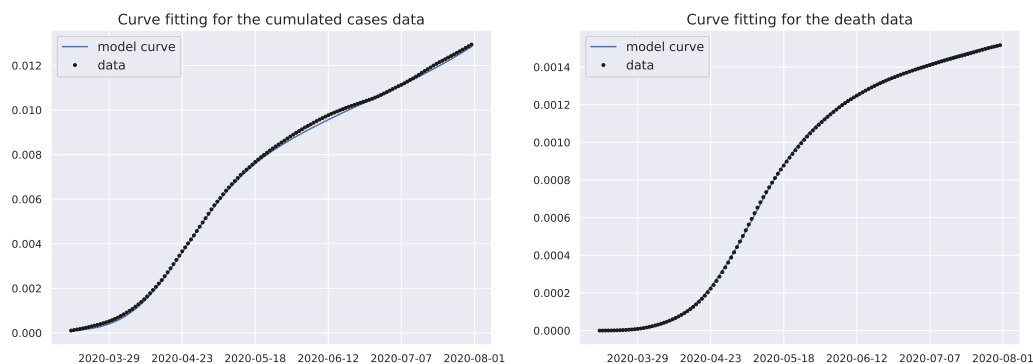

Figure 5: Fitting the curves of cumulative cases and deaths

| Parameters      | Interval       | Range of values of $\alpha$ |
|-----------------|----------------|-----------------------------|
| $\tau^{-1}$     | [2, 4]         | [0.897, 0.902]              |
| $\sigma^{-1}$   | [2, 4.5]       | [0.897, 0.9]                |
| $\rho$          | $[0, 10^{-4}]$ | [0.898, 0.899]              |
| $\gamma_1^{-1}$ | [6.5, 9.5]     | [0.894, 0.903]              |
| $\gamma_2^{-1}$ | [11, 16]       | [0.896, 0.898]              |

Table 6: Range of values of  $\alpha$  corresponding to admissible intervals of the parameters according to the references of Table 3

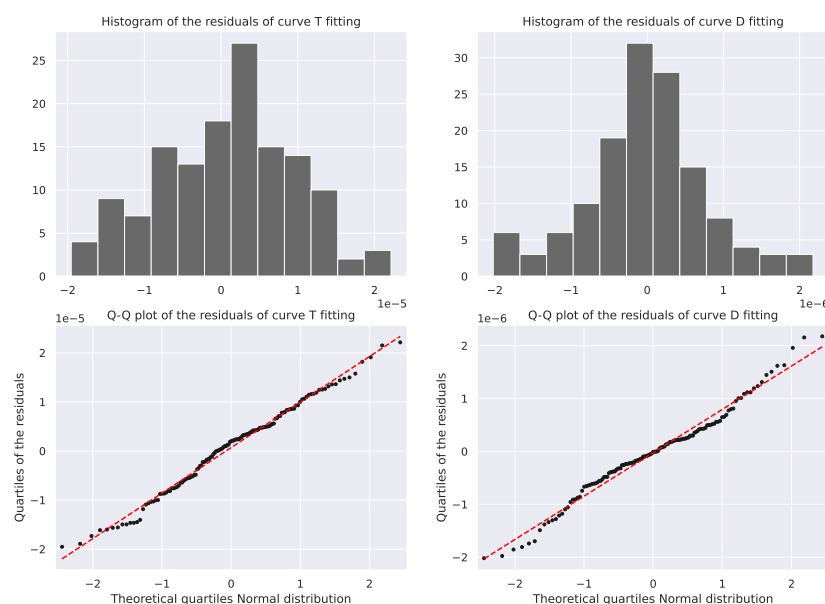

Figure 6: Graphical analysis of the model's residuals with histogram e Q-Q plot.

322 We also verify whether the model residuals approximate the errors, which  
323 are assumed to have a Gaussian distribution. The histograms of the residuals  
324 and the *Q-Q plots* (comparison of the quartiles of the Gaussian distribution  
325 with the quartiles of the sampling distribution of the residuals) are shown  
326 in Figure 6. In addition to this visual analysis, we can also apply statistical  
327 tests to verify correlation and normality: the *Ljung-Box test* (Ljung and  
328 Box, 1978) returns a p-value 0 which indicates that the residuals are not  
329 uncorrelated; the *Jarque-Bera test* (Jarque and Bera, 1980) does not reject  
330 the null hypothesis at the 5% level, which is an evidence supporting the  
331 normality of the residuals.

332 Another important outcome of the study is the estimate of the effective  
333 (time-varying) reproductive number  $\mathcal{R}_t$ . Figure 7 describes the evolution of

334  $\mathcal{R}_t$  in the period under consideration.

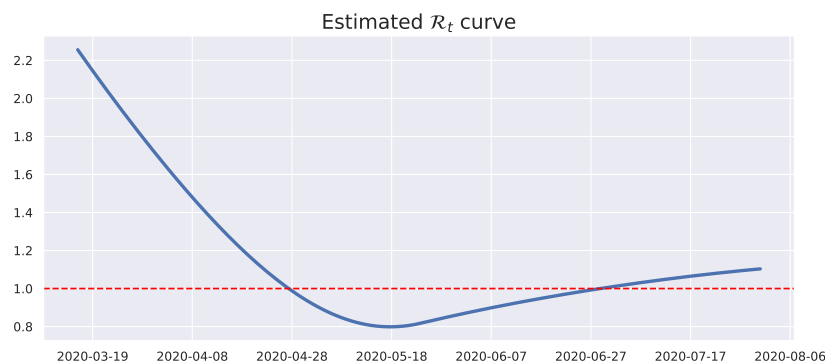

Figure 7: Effective (time-varying) reproduction number  $\mathcal{R}_t$ . The dashed red line indicates the threshold value  $\mathcal{R}_t = 1$

335 The correlation matrix among the estimated parameters (Section 3.3) is  
 336 depicted in Figure 8. It is worth noticing that the parameter  $\alpha$  and the  
 337 second coefficient of the B-spline of  $\beta$  have a strong inverse correlation.

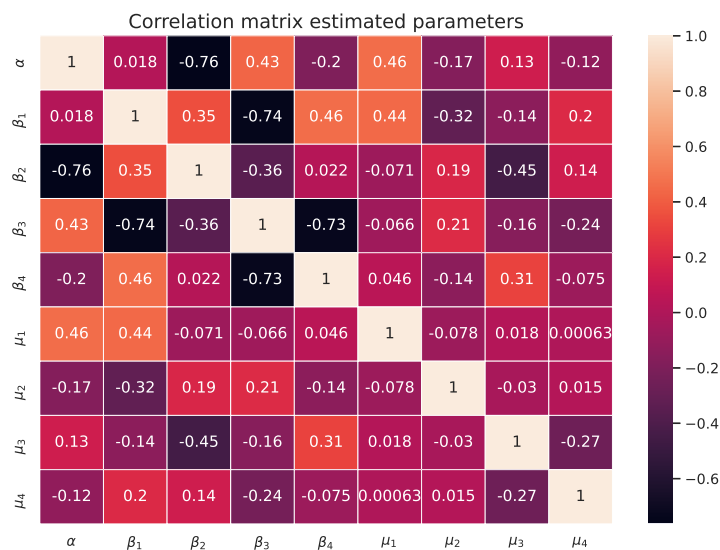

Figure 8: Correlation matrix of the estimated model's parameters.

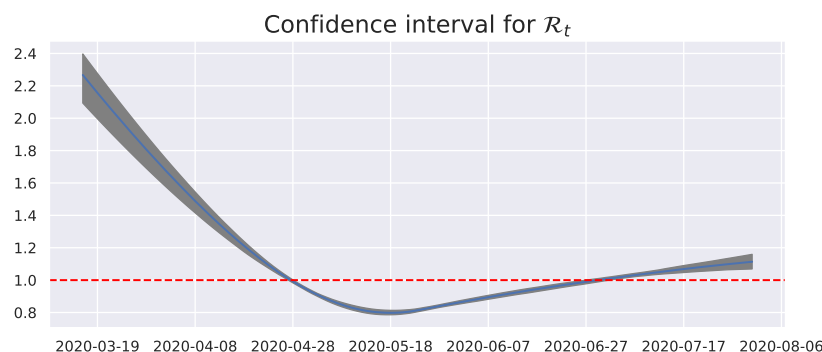

Figure 9: The blue curve is the median of the estimated curves and the gray represents the confidence interval for each time. The dashed red line is the threshold 1 for  $\mathcal{R}_t$ .

338 Relying on the Bootstrap method from Section 2.5 we derive confidence  
339 intervals for the parameters of the fitting: after  $N = 500$  simulations with  
340  $m = 10$ , we conclude that the 95% confidence interval for the unreported  
341 rate  $\alpha$  is  $(0.849, 0.931)$ . Figure 9 displays the confidence interval of  $\mathcal{R}_t$  over  
342 time. Figure 10 provides a scatter plot and histogram visualization for the  
343 estimated correlations in Figure 8. Finally, Table 7 summarizes the estimates  
344 for all parameters.

## 345 5. Discussion

346 The range of values for the unreported rate  $\alpha$  is in line with the results of  
347 other works on this issue: in Rio de Janeiro, (Prado et al., 2020) estimated  
348 the notification at 7.2%; at a Brazilian national level, (Canzian, 2020; Prado,  
349 2021; Portal COVID-19 Brasil, 2021) estimated the notification of cases in  
350 the range  $[7.8\%, 8.1\%]$ .

351 It is also interesting to compare the estimates of  $\mathcal{R}_t$  over time: in (Mellan  
352 et al., 2020), the point estimate for May 9, 2020 from the state of Rio de



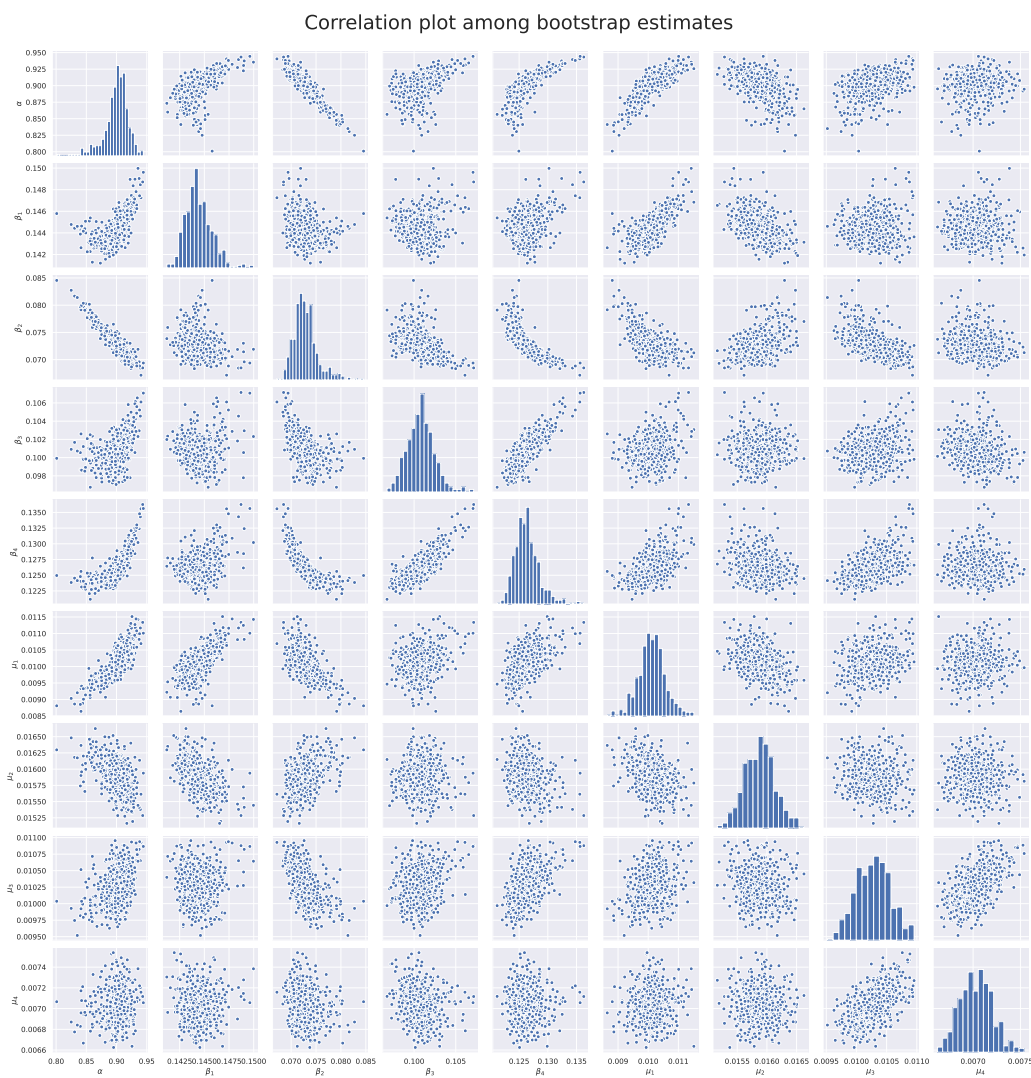

Figure 10: Scatter plots for each pair of two parameters, and their corresponding histogram.

| Parameter | Median               | Confidence interval                        |
|-----------|----------------------|--------------------------------------------|
| $\alpha$  | 0.903                | [0.849, 0.93]                              |
| $\beta_1$ | 0.144                | [0.142, 0.147]                             |
| $\beta_2$ | 0.073                | [0.069, 0.079]                             |
| $\beta_3$ | 0.101                | [0.098, 0.104]                             |
| $\beta_4$ | 0.126                | [0.123, 0.132]                             |
| $\mu_1$   | 0.0101               | [0.0092, 0.011]                            |
| $\mu_2$   | 0.0159               | [0.0154, 0.0164]                           |
| $\mu_3$   | 0.0103               | [0.0098, 0.0108]                           |
| $\mu_4$   | $7.03 \cdot 10^{-3}$ | $[6.73 \cdot 10^{-3}, 7.38 \cdot 10^{-3}]$ |

Table 7: Estimates of the median and confidence intervals for each parameter.

353 Janeiro was 1.1 with 95%-confidence interval [0.9, 1.3] , which includes our  
354 range of values. The curve estimated by (Observatório COVID-19 BR, 2021)  
355 for the city of Rio de Janeiro has a very similar trend as in Figure 7: at the  
356 beginning of May, the  $\mathcal{R}_t$  has an estimated value smaller than 1 and it grows  
357 again until it is greater than 1 at the end of July. These values corroborate  
358 our fitting.

359 The correlation between  $\alpha$  and  $\beta_2$  represents a limitation in terms of iden-  
360 tifiability of the system. In order to achieve a structural identifiability result  
361 it is necessary to know the recovered curve (see Appendix B), whereas for the  
362 practical identifiability it would be useful to approximate the transmission  
363 and mortality functions with a different model.

## 364 6. Conclusions

365 In this work, we combine tools from the analysis of differential equations,  
366 statistics, and optimization to estimate the unreported rate of COVID-19  
367 in the city of Rio de Janeiro during the first outbreak in March-July 2020.  
368 We determine that the rate of unreported positive cases is about 90%, with  
369 a confidence interval between 85% and 93%. This means that every case  
370 reported by the health system corresponds to about 9 – 10 cases that were not  
371 detected. This estimation shall be considered as a statistical approximation  
372 of the unreported rate: in addition to the lack of testing kits during the period  
373 under evaluation, other delays and errors at all stages of the notification  
374 process may generate bad inferences. Data analysis techniques have been  
375 deployed to deal with the low quality of data.

376 Concerning the modeling chosen for the fitting, it is of great importance to  
377 underline that the initialization of the parameters has little influence on the  
378 final estimation of  $\alpha$ , supporting the robustness of our analysis. However,  
379 the fact that the residuals of the estimation are normally distributed but  
380 correlated needs more attention and will be addressed in future works.

381 Finally, the outcome of this work provides a description of the evolution  
382 in time of the disease reproductive number. This estimation provides a useful  
383 tool to determine periods of growth or decrease of the epidemic force at a  
384 geo-localized level, and thus to inform policymakers in their decision process  
385 to limit the spread of the virus and its consequences on the population.

## 386 **Appendix A. Variance estimate**

387 For the variances  $\sigma_1^2$  and  $\sigma_2^2$ , we follow the estimates from (Seber and  
388 Wild, 2005, p. 21-28) given by

$$\hat{\sigma}_1^2 = \frac{1}{n - K} (y^{(1)} - \hat{T}(\hat{\theta}))^T \Sigma^{-1} (y^{(1)} - \hat{T}(\hat{\theta})) ,$$

389 where  $K = r + s + 1$  and  $n$  is the number of data points. In a similar way,

$$\hat{\sigma}_2^2 = \frac{1}{n - K} (y^{(2)} - \hat{D}(\hat{\theta}))^T \Sigma^{-1} (y^{(2)} - \hat{D}(\hat{\theta})) .$$

## 390 **Appendix B. DAISY**

391 DAISY - Differential Algebra for Identifiability of SYstems - is a software  
392 based on the programming language *Reduce*, specific to the problem of iden-  
393 tifiability in dynamical systems. DAISY requires certain specific conditions  
394 on the system, that allow to apply algebraic methods to the model under  
395 consideration. In order to rewrite our system (1) in terms of the DAISY al-  
396 gorithm, we treat all model parameters' in Section 2.1 as constant in time. If  
397 we assume to know the curve  $R$  of recovered cases, we verify that model (1)  
398 is globally identifiable. However, the knowledge of  $R$  may sometimes be  
399 only partially available, as discussed in Section 2.2. Without access to these  
400 data, DAISY has not been able to certify the structural identifiability of the  
401 system.

## 402 **Acknowledgements**

403 The authors wish to thank Luiz Max Carvalho (FGV EMAP) and Marcelo  
404 Fernandes (FGV EESP) for fruitful discussions about several statistical meth-

405 ods applied in this research.

406 The first and third authors were supported by FAPERJ and CNPq, Brazil.

407 The second author acknowledges the funding of the Natural Sciences and En-

408 gineering Research Council of Canada (NSERC). The third author thanks

409 the Center for the Development of Mathematics and Science (FGV CDMC)

410 for their support.

## 411 **References**

412 Aronna, M., Guglielmi, R., Moschen, L., 2021. A model for COVID-19

413 with isolation, quarantine and testing as control measures. *Epidemics* 34,

414 100437. URL: [https://www.sciencedirect.com/science/article/](https://www.sciencedirect.com/science/article/pii/S1755436521000025)

415 [pii/S1755436521000025](https://www.sciencedirect.com/science/article/pii/S1755436521000025), doi:[https://doi.org/10.1016/j.epidem.](https://doi.org/10.1016/j.epidem.2021.100437)

416 [2021.100437](https://doi.org/10.1016/j.epidem.2021.100437).

417 Audoly, S., Bellu, G., D'Angio, L., Saccomani, M., Cobelli, C., 2001. Global

418 identifiability of nonlinear models of biological systems. *IEEE Transactions*

419 *on Biomedical Engineering* 48, 55–65. doi:[10.1109/10.900248](https://doi.org/10.1109/10.900248).

420 Bellu, G., Saccomani, M.P., Audoly, S., D'Angiò, L., 2007. DAISY: A new

421 software tool to test global identifiability of biological and physiological

422 systems. *Computer Methods and Programs in Biomedicine* 88, 52–61.

423 Byrd, R.H., Lu, P., Nocedal, J., Zhu, C., 1995. A limited memory algorithm

424 for bound constrained optimization. *SIAM Journal on Scientific Comput-*

425 *ing* 16, 1190–1208.

426 Byrne, A.W., McEvoy, D., Collins, A.B., Hunt, K., Casey, M., Barber, A.,

427 Butler, F., Griffin, J., Lane, E.A., McAloon, C., et al., 2020. Inferred

428 duration of infectious period of SARS-CoV-2: rapid scoping review and  
429 analysis of available evidence for asymptomatic and symptomatic COVID-  
430 19 cases. *BMJ Open* 10, e039856.

431 Canzian, F., 2020. Estados e municípios no país relatam subnotificação gigan-  
432 tesca de casos (States and cities alert on a huge underreporting of cases).  
433 Available at [https://www1.folha.uol.com.br/equilibrioesaude/](https://www1.folha.uol.com.br/equilibrioesaude/2020/04/estados-e-municipios-no-pais-relatam-subnotificacao-gigantesca-de-casos.shtml)  
434 [2020/04/estados-e-municipios-no-pais-relatam-subnotificacao-](https://www1.folha.uol.com.br/equilibrioesaude/2020/04/estados-e-municipios-no-pais-relatam-subnotificacao-gigantesca-de-casos.shtml)  
435 [gigantesca-de-casos.shtml](https://www1.folha.uol.com.br/equilibrioesaude/2020/04/estados-e-municipios-no-pais-relatam-subnotificacao-gigantesca-de-casos.shtml). Folha de São Paulo Newspaper.

436 Cao, J., Huang, J.Z., Wu, H., 2012. Penalized nonlinear least squares estima-  
437 tion of time-varying parameters in ordinary differential equations. *Journal*  
438 *of Computational and Graphical Statistics* 21, 42–56.

439 Croda, J., Oliveira, W.K.d., Frutuoso, R.L., Mandetta, L.H., Baia-da Silva,  
440 D.C., Brito-Sousa, J.D., Monteiro, W.M., Lacerda, M.V.G., 2020. COVID-  
441 19 in Brazil: advantages of a socialized unified health system and prepara-  
442 tion to contain cases. *Revista da Sociedade Brasileira de Medicina Tropical*  
443 53.

444 Dantas, G., Siciliano, B., França, B.B., da Silva, C.M., Arbilla, G., 2020.  
445 The impact of COVID-19 partial lockdown on the air quality of the city  
446 of Rio de Janeiro, Brazil. *Science of the Total Environment* 729, 139085.

447 De Boor, C., 1978. A practical guide to splines. volume 27. Springer Verlag  
448 New York.

449 Efron, B., Tibshirani, R., 1986. Bootstrap methods for standard errors,

450 confidence intervals, and other measures of statistical accuracy. *Statistical*  
451 *Science*, 54–75.

452 Estadão, 2020. Governo do Rio cria classificação em 3 bandeiras para flex-  
453 ibilizar isolamento (Government of Rio creates classification in 3 flags to  
454 make isolation more flexible). Available at <https://revistapegn.globo.com/Noticias/noticia/2020/05/pegn-governo-do-rio-cria-classificacao-em-3-bandeiras-para-flexibilizar-isolamento.html>.  
457 [html](https://revistapegn.globo.com/Noticias/noticia/2020/05/pegn-governo-do-rio-cria-classificacao-em-3-bandeiras-para-flexibilizar-isolamento.html).

458 IBGE, 2020. Brazilian Institute for Geography and Statistics. Brazilian  
459 National Household Survey Sample - PNAD COVID-19. Available at  
460 <https://www.ibge.gov.br/estatisticas/sociais/trabalho/27946-divulgacao-semanal-pnadcovid1.html?=&t=downloads>.  
461 [divulgacao-semanal-pnadcovid1.html?=&t=downloads](https://www.ibge.gov.br/estatisticas/sociais/trabalho/27946-divulgacao-semanal-pnadcovid1.html?=&t=downloads).

462 IBGE, 2021. Brazilian Institute for Geography and Statistics. Cities and  
463 States. Available at <https://www.ibge.gov.br/cidades-e-estados/rj/rio-de-janeiro.html>.  
464 [rj/rio-de-janeiro.html](https://www.ibge.gov.br/cidades-e-estados/rj/rio-de-janeiro.html).

465 Jarque, C.M., Bera, A.K., 1980. Efficient tests for normality, homoscedastic-  
466 ity and serial independence of regression residuals. *Economics Letters* 6,  
467 255–259.

468 Joshi, M., Seidel-Morgenstern, A., Kremling, A., 2006. Exploiting the boot-  
469 strap method for quantifying parameter confidence intervals in dynamical  
470 systems. *Metabolic Engineering* 8, 447–455.

471 Kucirka, L.M., Lauer, S.A., Laeyendecker, O., Boon, D., Lessler, J., 2020.  
472 Variation in false-negative rate of reverse transcriptase polymerase chain

473 reaction-based SARS-CoV-2 tests by time since exposure. *Annals of In-*  
474 *ternal Medicine* 173, 262–267.

475 Li, R., Pei, S., Chen, B., Song, Y., Zhang, T., Yang, W., Shaman, J., 2020.  
476 Substantial undocumented infection facilitates the rapid dissemination of  
477 novel coronavirus (SARS-CoV-2). *Science* 368, 489–493.

478 Liang, H., Miao, H., Wu, H., 2010. Estimation of constant and time-varying  
479 dynamic parameters of HIV infection in a nonlinear differential equation  
480 model. *The Annals of Applied Statistics* 4, 460.

481 Ljung, G.M., Box, G.E., 1978. On a measure of lack of fit in time series  
482 models. *Biometrika* 65, 297–303.

483 Ljung, L., Glad, T., 1994. On global identifiability for arbitrary model  
484 parametrizations. *Automatica* 30, 265–276.

485 Mellan, T.A., Hoeltgebaum, H.H., Mishra, S., Whittaker, C., Schnekenberg,  
486 R.P., Gandy, A., Unwin, H.J.T., Vollmer, M.A., Coupland, H., Hawryluk,  
487 I., et al., 2020. Subnational analysis of the COVID-19 epidemic in Brazil.  
488 *MedRxiv* .

489 Miao, H., Xia, X., Perelson, A.S., Wu, H., 2011. On identifiability of non-  
490 linear ODE models and applications in viral dynamics. *SIAM Review* 53,  
491 3–39.

492 Moschen, L.M., 2021. Repository COVID-19. Github. Available at [https :](https://github.com/lucamoschen/covid-19-model)  
493 [//github.com/lucamoschen/covid-19-model](https://github.com/lucamoschen/covid-19-model).



494 Municipal Health Department, City Hall of Rio de Janeiro, 2021. Dados  
495 individuais dos casos confirmados de COVID-19 no município do Rio de  
496 Janeiro (Individual data of COVID-19 confirmed cases in the city of Rio  
497 de Janeiro). Available at [https://www.arcgis.com/home/item.html?  
498 id=f314453b3a55434ea8c8e8caaa2d8db5](https://www.arcgis.com/home/item.html?id=f314453b3a55434ea8c8e8caaa2d8db5).

499 Nogrady, B., 2020. What the data say about asymptomatic COVID infec-  
500 tions. *Nature* .

501 Observatório COVID-19 BR, 2021. R efetivo no Rio de Janeiro (Effective  
502 R in Rio de Janeiro. Available at [https://covid19br.github.io/  
503 municipios.html?aba=aba3&uf=RJ&mun=Rio\\_de\\_Janeiro](https://covid19br.github.io/municipios.html?aba=aba3&uf=RJ&mun=Rio_de_Janeiro).

504 Official Journal of the State of Rio de Janeiro, 2020a. Ordinance number  
505 46.973, March 16th 2020. Available at [https://pge.rj.gov.br/comum/  
506 code/MostrarArquivo.php?C=MTAyMjI](https://pge.rj.gov.br/comum/code/MostrarArquivo.php?C=MTAyMjI).

507 Official Journal of the State of Rio de Janeiro, 2020b. Law number 8859,  
508 June 3rd, 2020. Available at [http://www.aeerj.net.br/file/04-06-  
509 2020-leiestadomascara.pdf](http://www.aeerj.net.br/file/04-06-2020-leiestadomascara.pdf).

510 Portal COVID-19 Brasil, 2021. COVID-19 BRASIL. Available at [https :  
511 //ciis.fmrp.usp.br/covid19/](https://ciis.fmrp.usp.br/covid19/).

512 Prado, M.F.d., Antunes, B.B.d.P., Bastos, L.d.S.L., Peres, I.T., Silva,  
513 A.d.A.B.d., Dantas, L.F., Baião, F.A., Maçaira, P., Hamacher, S., Bozza,  
514 F.A., 2020. Análise da subnotificação de COVID-19 no Brasil (Analy-  
515 sis of COVID-19 underreporting in Brazil). *Revista Brasileira de Terapia  
516 Intensiva* .

517 Prado, M.F.d.*et al.*, 2021. Análise de subnotificação do número de casos  
518 confirmados da COVID-19 no Brasil (Analysis of underreporting of the  
519 number of confirmed cases of COVID-19 in Brazil). Available at [https :  
520 //drive.google.com/file/d/1\\_whlqZnGgvqHuWCG4-JyiL2X9WXpZAe3/  
521 view](https://drive.google.com/file/d/1_whlqZnGgvqHuWCG4-JyiL2X9WXpZAe3/view).

522 Rai, B., Shukla, A., Dwivedi, L.K., 2021. Incubation period for COVID-19:  
523 a systematic review and meta-analysis. *Journal of Public Health* , 1–8.

524 Ramsay, J.O., Hooker, G., Campbell, D., Cao, J., 2007. Parameter estimation  
525 for differential equations: a generalized smoothing approach. *Journal of the  
526 Royal Statistical Society: Series B (Statistical Methodology)* 69, 741–796.

527 Saccomani, M.P., Thomaseth, K., 2019. Calculating all multiple parameter  
528 solutions of ODE models to avoid biological misinterpretations. *Mathe-  
529 matical Biosciences and Engineering* 16, 6438–6453.

530 Seber, G., Wild, C., 2005. *Nonlinear Regression*. Wiley Series in Probability  
531 and Statistics, Wiley. URL: [https://books.google.com.br/books?id=  
532 YBY1CpBNo\\_cC](https://books.google.com.br/books?id=YBY1CpBNo_cC).

533 The 2019 nCoV Outbreak Joint Field Epidemiology Investigation Team and  
534 Q. Li, 2020. An Out-break of NCIP (2019-nCoV) Infection in China -  
535 Wuhan, Hubei Province, 2019 - 2020. Available at [http : / / weekly .  
536 chinacdc . cn / en / article / id / e3c63ca9 - dedb - 4fb6 - 9c1c -  
537 d057adb77b57](http://weekly.chinacdc.cn/en/article/id/e3c63ca9-dedb-4fb6-9c1c-d057adb77b57).

538 Virtanen, P., Gommers, R., Oliphant, T.E., Haberland, M., Reddy, T.,  
539 Cournapeau, D., Burovski, E., Peterson, P., Weckesser, W., Bright, J.,

540 et al., 2020. SciPy 1.0: fundamental algorithms for scientific computing in  
541 Python. Nature Methods 17, 261–272.

542 World Health Organization, 2020. Coronavirus disease (COVID-19). Avail-  
543 able at [https://www.who.int/emergencies/diseases/novel-](https://www.who.int/emergencies/diseases/novel-coronavirus-2019/question-and-answers-hub/q-a-detail/coronavirus-disease-covid-19)  
544 [coronavirus-2019/question-and-answers-hub/q-a-detail/](https://www.who.int/emergencies/diseases/novel-coronavirus-2019/question-and-answers-hub/q-a-detail/coronavirus-disease-covid-19)  
545 [coronavirus-disease-covid-19](https://www.who.int/emergencies/diseases/novel-coronavirus-2019/question-and-answers-hub/q-a-detail/coronavirus-disease-covid-19).
